# Supplementary material for: Capacitive properties of carbon nanofibers derived from blends of cellulose acetate and polyacrylonitrile
Source: Royal Society of Chemistry journal article supplement (doi:10.1039/d3nj02116e), 2023-01-01
Supplement: d3nj02116e1.pdf [file d3nj02116e1.pdf]

## Capacitive properties of carbon nanofibers derived from blends of cellulose acetate and polyacrylonitrile

Zhenzhao Chen<sup>a</sup>, Guoqing Chen<sup>a</sup>, Changshui Wang<sup>a</sup>, Dai Chen<sup>a</sup>, Qian Zhang<sup>b\*</sup>, Longjun Jiang<sup>b</sup>, Chunmei Zhang<sup>c\*</sup>, Kunming Liu<sup>d</sup>, Shuijian He<sup>a\*</sup>

<sup>a</sup> *Co-Innovation Center of Efficient Processing and Utilization of Forest Resources, International Innovation Center for Forest Chemicals and Materials, College of Materials Science and Engineering, Nanjing Forestry University, Nanjing, 210037, China.*

<sup>b</sup> *College of Science, Nanjing Forestry University, Nanjing 210037, China.*

<sup>c</sup> *Institute of Materials Science and Devices, School of Materials Science and Engineering, Suzhou University of Science and Technology, Suzhou 215009, China.*

<sup>d</sup> *Faculty of Materials Metallurgy and Chemistry, Jiangxi University of Science and Technology, Ganzhou, 341000, China*

\* Corresponding authors

*E-mail:* [zhangqian5689@njfu.edu.cn](mailto:zhangqian5689@njfu.edu.cn) (Qian Zhang), [cmzhang@usts.edu.cn](mailto:cmzhang@usts.edu.cn) (Chunmei Zhang), [shuijianhe@njfu.edu.cn](mailto:shuijianhe@njfu.edu.cn) (Shuijian He)

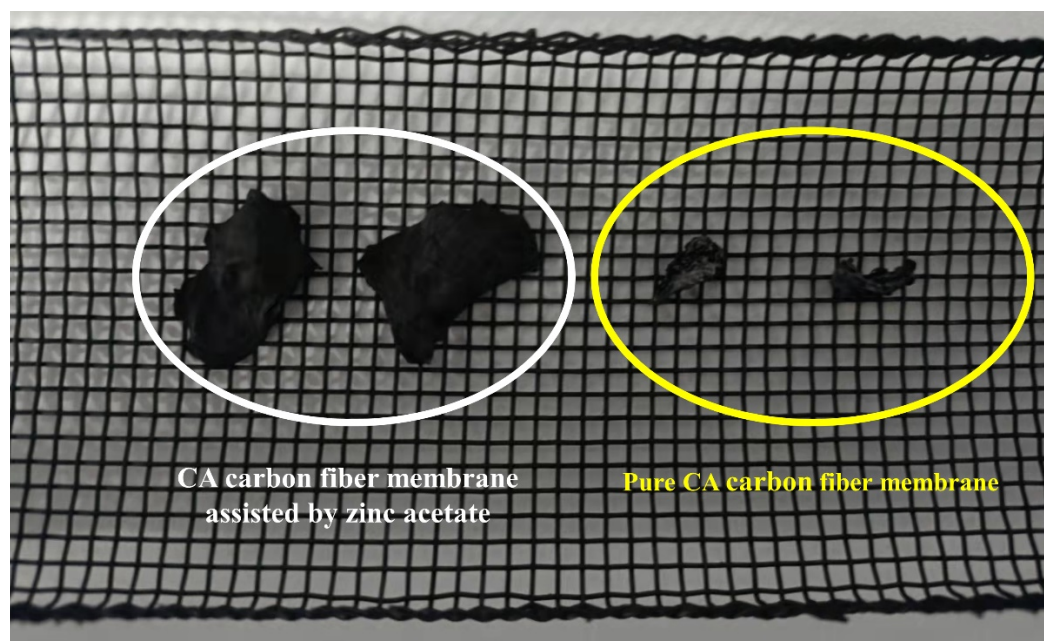

Fig. S1 CA carbon fiber membrane assisted by zinc acetate and pure CA carbon fiber membrane.

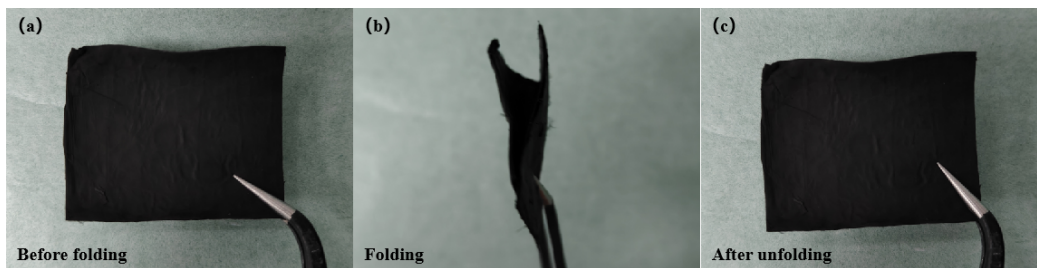

Fig. S2 Optical images of CNF-C<sub>6</sub>P<sub>1</sub> (a) before folding, (b) folded with an angle of 180°, (c) after unfolding.

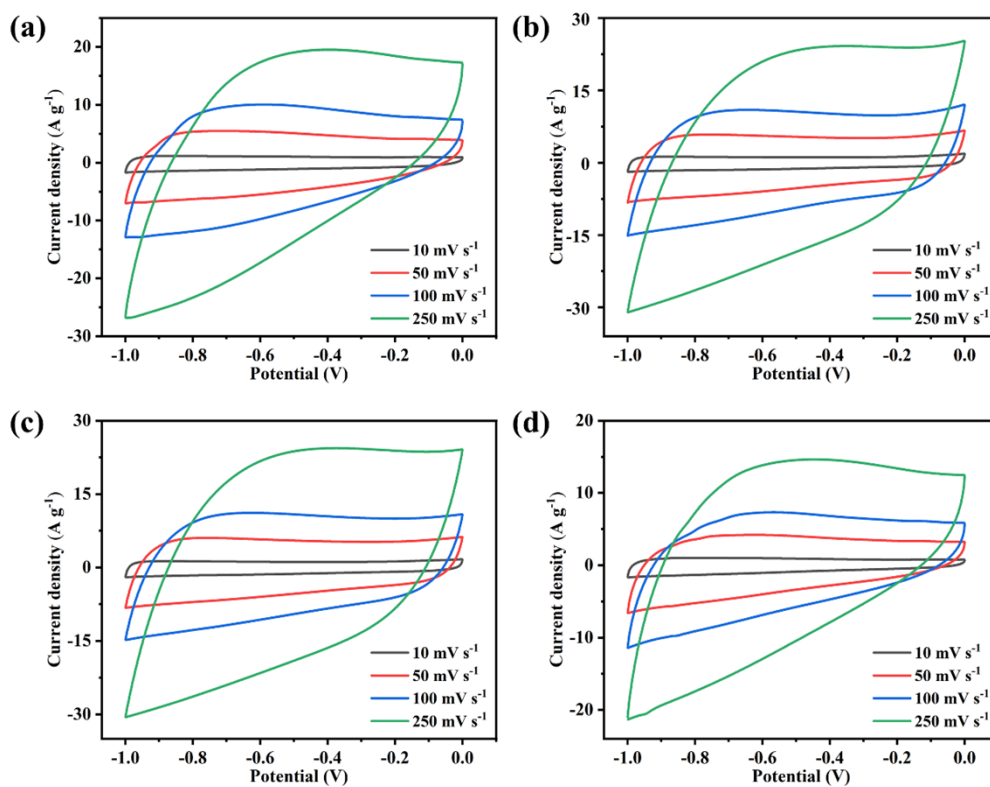

Fig. S3 CV profiles for (a) CNF-C<sub>2</sub>P<sub>1</sub>, (b) CNF-C<sub>4</sub>P<sub>1</sub>, (c) CNF-C<sub>6</sub>P<sub>1</sub> and (d) CNF-C<sub>8</sub>P<sub>1</sub> electrode at various scanning rates.

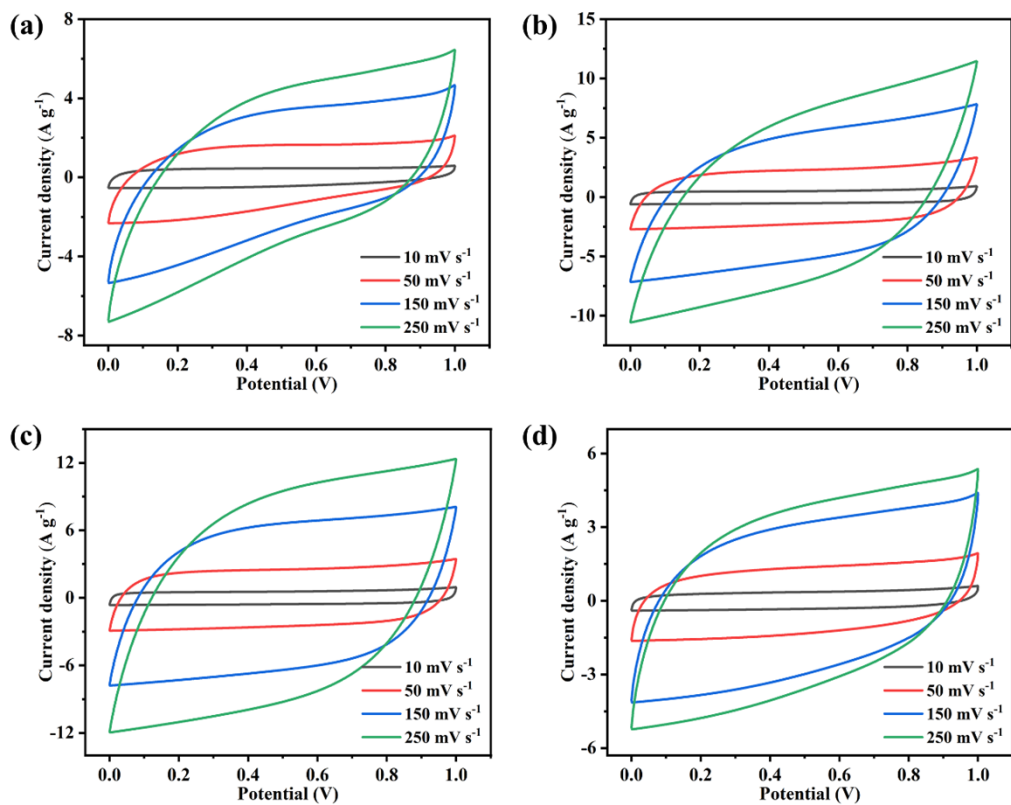

Fig. S4 CV curves for CNF-C<sub>x</sub>P<sub>1</sub> electrodes at different scanning rates.

Table S1 The C, O and N contents of CNF-C<sub>x</sub>P<sub>1</sub> samples.

| Characterizations |               | CNF-C <sub>2</sub> P <sub>1</sub> | CNF-C <sub>4</sub> P <sub>1</sub> | CNF-C <sub>6</sub> P <sub>1</sub> | CNF-C <sub>8</sub> P <sub>1</sub> |        |
|-------------------|---------------|-----------------------------------|-----------------------------------|-----------------------------------|-----------------------------------|--------|
|                   | C (%)         | 89.94                             | 91.90                             | 85.97                             | 88.64                             |        |
|                   | O (%)         | 4.82                              | 5.11                              | 10.77                             | 7.75                              |        |
|                   | N (%)         | 4.24                              | 2.99                              | 3.26                              | 3.61                              |        |
| XPS               | C=O           | B.E. (eV)                         | 531.00                            | 531.27                            | 531.30                            | 531.10 |
|                   |               | Content (%)                       | 3.78                              | 3.70                              | 6.93                              | 5.98   |
|                   | C-OH or O-C=O | B.E. (eV)                         | 532.62                            | 532.51                            | 532.57                            | 532.68 |
|                   |               | Content (%)                       | 1.04                              | 1.41                              | 3.84                              | 1.77   |
|                   | N-6           | B.E. (eV)                         | 398.10                            | 398.10                            | 397.89                            | 398.10 |
|                   |               | Content (%)                       | 0.50                              | 0.29                              | 0.26                              | 0.41   |
|                   | N-5           | B.E. (eV)                         | 399.60                            | 399.70                            | 399.60                            | 399.60 |
|                   |               | Content (%)                       | 1.53                              | 1.18                              | 1.40                              | 1.31   |
|                   | N-Q           | B.E. (eV)                         | 401.06                            | 401.00                            | 401.10                            | 401.10 |
|                   |               | Content (%)                       | 1.46                              | 1.11                              | 1.08                              | 0.98   |

Table S2 Comparison between this work and others present in literature for supercapacitor characteristics.

| Types of Cell  | Composition                             | Specific Capacitance                                                                | Cycle stability          | Remarks                           | Ref. |
|----------------|-----------------------------------------|-------------------------------------------------------------------------------------|--------------------------|-----------------------------------|------|
| Two electrodes | Commercial cotton cloth                 | 116 F g <sup>-1</sup> (0.2 A g <sup>-1</sup> )<br>6 M KOH                           | 85%<br>(15,000 cycles)   | Self-supporting                   | 1    |
| Two electrodes | Potassium citrate/vermicelli            | 90 F g <sup>-1</sup> (0.1 A g <sup>-1</sup> )<br>6 M KOH                            | 96.9%<br>(10,000 cycles) | Non-flexibility                   | 2    |
| Two electrodes | Resorcinol/formaldehyde resin           | 73 F g <sup>-1</sup> (0.1 A g <sup>-1</sup> )<br>1 M KOH                            | 97.7%<br>(10,000 cycles) | Non-flexibility                   | 3    |
| Two electrodes | Polyimide/H <sub>2</sub> O <sub>2</sub> | 166 F g <sup>-1</sup> (0.5 A g <sup>-1</sup> )<br>6 M KOH                           | 87.6%<br>(20,000 cycles) | Self-supporting                   | 4    |
| Two electrodes | Osmanthus                               | 86 F g <sup>-1</sup> (1 A g <sup>-1</sup> )<br>3 M KOH                              | 93.5%<br>(10,000 cycles) | Non-flexibility                   | 5    |
| Two electrodes | Microcrystalline cellulose              | 129 F g <sup>-1</sup> (0.1 A g <sup>-1</sup> )<br>6 M KOH                           | 99.9%<br>(3000 cycles)   | Non-flexibility                   | 6    |
| Two electrodes | GO/Loblolly pine                        | 94 F g <sup>-1</sup> (0.5 A g <sup>-1</sup> )<br>1 M H <sub>2</sub> SO <sub>4</sub> | 93.5%<br>(10,000 cycles) | Flexibility                       | 7    |
| Two electrodes | CA/ZnCl <sub>2</sub>                    | 143 F g <sup>-1</sup> (0.1 A g <sup>-1</sup> )<br>6 M KOH                           | 92%<br>(5000 cycles)     | Self-supporting;<br>deacetylation | 8    |
| Two electrodes | Lignocellulosic biomasses               | 130 F g <sup>-1</sup> (0.1 A g <sup>-1</sup> )<br>6 M KOH                           | 88%<br>(2500 cycles)     | Non-flexibility                   | 9    |
| Two electrodes | Chinese fir bark                        | 105 F g <sup>-1</sup> (0.5 A g <sup>-1</sup> )                                      | 91%                      | Non-flexibility                   | 10   |

|            |                                              |                                                 |                  |                  |      |
|------------|----------------------------------------------|-------------------------------------------------|------------------|------------------|------|
| electrodes |                                              | 6 M KOH                                         | (10,000 cycles)  |                  |      |
| Two        | Banana peels                                 | 87 F g <sup>-1</sup> (1 A g <sup>-1</sup> )     | /                | Non-flexibility  | 11   |
| electrodes |                                              | 1 M H <sub>2</sub> SO <sub>4</sub>              |                  |                  |      |
| Two        | PVP/PIn                                      | 97 F g <sup>-1</sup> (1 A g <sup>-1</sup> )     | 87.8%            | Non-flexibility  | 12   |
| electrodes |                                              | 1 M H <sub>2</sub> SO <sub>4</sub>              | (3000 cycles)    |                  |      |
| Two        | Asclepias syriaca                            | 38 F g <sup>-1</sup> (1 A g <sup>-1</sup> )     | 80%              | Non-flexibility  | 13   |
| electrodes |                                              | 1 M KOH                                         | (200,000 cycles) |                  |      |
| Two        | Ginger cellulose                             | 103 F g <sup>-1</sup> (0.25 A g <sup>-1</sup> ) | 94.8%            | Flexibility      | 14   |
| electrodes |                                              | 1 M H <sub>2</sub> SO <sub>4</sub>              | (1000 cycles)    |                  |      |
| Three      | Carbon black/CA                              | 101 F g <sup>-1</sup> (0.5 A g <sup>-1</sup> )  | 74%              | Flexibility      | 15   |
| electrodes |                                              | 1 M KOH                                         | (100 cycles)     |                  |      |
| Two        | CA/KOH                                       | 52 F g <sup>-1</sup> (0.25 A g <sup>-1</sup> )  | 97.2%            | Non-flexibility  | 16   |
| electrodes |                                              | 6 M KOH                                         | (5000 cycles)    |                  |      |
| Two        | CA/K <sub>2</sub> CO <sub>3</sub>            | 199 F g <sup>-1</sup> (1 A g <sup>-1</sup> )    | ~100%            | Non-flexibility; | 17   |
| electrodes |                                              | 6 M KOH                                         | (10,000 cycles)  |                  |      |
| Three      | CA/ NaOH                                     | 229 F g <sup>-1</sup> (0.2 A g <sup>-1</sup> )  | ~97.3%           | Non-flexibility; | 18   |
| electrodes |                                              | 6 M KOH                                         | (40,000 cycles)  | deacetylation    |      |
| Two        | CA/bead cellulose                            | 142 F g <sup>-1</sup> (1 A g <sup>-1</sup> )    | ~77%             | Non-flexibility; | 19   |
| electrodes |                                              | 4 M KOH                                         | (10,000 cycles)  | deacetylation    |      |
| Three      | CA/PAN/(CH <sub>3</sub> COO) <sub>2</sub> Zn | 132 F g <sup>-1</sup> (0.5 A g <sup>-1</sup> )  | 98.2%            |                  | This |
| electrodes |                                              | 6 M KOH                                         | (10,000 cycles)  | Flexibility      | work |
| Two        |                                              | 111 F g <sup>-1</sup> (0.1 A g <sup>-1</sup> )  | 85%              |                  |      |

---

## References

1. W. Zhao, B. Yan, D. Chen, J. Chen, Q. Zhang, L. Jiang, T. Lan, C. Zhang, W. Yang and S. He, *Colloids and Surfaces A: Physicochemical and Engineering Aspects*, 2023, 668, 131425.
2. J. Zheng, B. Yan, L. Feng, Q. Zhang, C. Zhang, W. Yang, J. Han, S. Jiang and S. He, *Diamond and Related Materials*, 2022, 128, 109247.
3. L. Chen, J. Deng, Y. Yuan, S. Hong, B. Yan, S. He and H. Lian, *Diamond and Related Materials*, 2022, 121, 108781.
4. B. Yan, J. Zheng, L. Feng, Q. Zhang, J. Han, H. Hou, C. Zhang, Y. Ding, S. Jiang and S. He, *Diamond and Related Materials*, 2022, 130, 109465.
5. J. Li, Y. Zou, C. Xiang, F. Xu, L. Sun, B. Li and J. Zhang, *Journal of Energy Storage*, 2021, 42, 103017.
6. L. E. J. Sun, W. Gan, Z. Wu, Z. Xu, L. Xu, C. Ma, W. Li and S. Liu, *Journal of Energy Storage*, 2021, 38, 102414.
7. Q. Wu, C. Jiang, S. Zhang, S. Yu and L. Huang, *Journal of Materials Chemistry A*, 2022, 10, 16853-16865.
8. Q. Fan, C. Ma, L. Wu, C. Wei, H. Wang, Y. Song and J. Shi, *RSC Advances*, 2019, 9, 6419-6428.
9. H. Wei, H. Wang, A. Li, H. Li, D. Cui, M. Dong, J. Lin, J. Fan, J. Zhang, H. Hou, Y. Shi, D. Zhou and Z. Guo, *Journal of Alloys and Compounds*, 2020, 820, 153111.
10. L. Luo, Y. Zhou, W. Yan, X. Wu, S. Wang and W. Zhao, *Electrochimica Acta*, 2020, 360, 137010.
11. A. Raji, J. I. E. Thomas Nesakumar, S. Mani, S. Perumal, V. Rajangam, S. Thirunavukkarasu and Y. R. Lee, *Journal of Industrial and Engineering Chemistry*, 2021, 98, 308-317.
12. P. Zhou, F. Xiao, R. Weng, Q. Huang, L. Wang, Q. He, W. Tang, P. Yang, R. Su, P. He, B. Jia and L. Bian, *Journal of Materials Chemistry A*, 2022, 10, 10514-10524.
13. G. Byatarayappa, V. Guna, R. M. G, K. Venkatesh, Y. Zhao, N. N, N. Reddy and K. Nagaraju, *Sustainable Energy & Fuels*, 2022, 6, 4034-4047.
14. D.-C. Wang, H.-Y. Yu, Z. Ouyang, D. Qi, Y. Zhou, A. Ju, Z. Li and Y. Cao, *Nanoscale*, 2022, 14, 5163-5173.
15. G. G. Daniele, D. C. de Souza, P. R. de Oliveira, L. O. Orzari, R. V. Blasques, R. L. Germscheidt, E. C. da Silva, L. A. Pocrifka, J. A. Bonacin and B. C. Janegitz, *C*, 2022, 8, 32.
16. R. Bi, S.-K. Pang, K.-C. Yung and L.-K. Yin, *Journal of Electroanalytical Chemistry*, 2022, 925, 116915.
17. L. Li, C. Jia, X. Zhu and S. Zhang, *Journal of Cleaner Production*, 2020, 256, 120326.
18. Y. Wang, J. Cui, Q. Qu, W. Ma, F. Li, W. Du, K. Liu, Q. Zhang, S. He and C. Huang, *Microporous and Mesoporous Materials*, 2022, 329, 111545.

19. J. Fischer, K. Thümmel, S. Fischer, I. G. Gonzalez Martinez, S. Oswald and D. Mikhailova, *Energy & Fuels*, 2021, 35, 12653-12665.
